# Supplementary material for: Prevention of Teratogenesis in Pregnancies of Obese Rats by Vitamin E Supplementation
Source: MDPI journal article supplement (doi:10.3390/antiox10081173), 2021-07-23
Supplement: s1 [file s1]

| Supplementary Table S1. Diet composition. |                                    |                                        |
|-------------------------------------------|------------------------------------|----------------------------------------|
| Cafeteria diet composition                |                                    |                                        |
| Ingredient                                | Content (%)                        |                                        |
| Ground commercial rat chow                | 33                                 |                                        |
| Full fat condensed milk                   | 35                                 |                                        |
| White sugar                               | 7                                  |                                        |
| Muffins                                   | 10                                 |                                        |
| Powdered milk                             | 15                                 |                                        |
| Caloric content                           |                                    |                                        |
|                                           | Standard<br>chow diet (C<br>group) | Cafeteria diet<br>(O and OE<br>groups) |
| Kcal/100g                                 | 194.3                              | 242.1                                  |
| % Energy from carbohydrates               | 67                                 | 58.6                                   |
| Kcal/100g                                 | 37.7                               | 118.6                                  |
| % Energy from fat                         | 13                                 | 28.7                                   |
| Kcal/100g                                 | 58                                 | 52.4                                   |
| % Energy from protein                     | 20                                 | 12.7                                   |
| Kcal/100g                                 | 290                                | 413.1                                  |
| Total (%)                                 | 100                                | 100                                    |

Supplementary Table S2. List of primers used in the qPCR analysis.

| Gene              | Accession number | Forward (5'-3')        | Reverse (5'-3')           |
|-------------------|------------------|------------------------|---------------------------|
| <i>Cat</i>        | NM_012520.2      | TCAGGGATGCCATGTTGTT    | GGGTCCTTCAGGTGAGTTTG      |
| <i>Cu, Zn Sod</i> | NM_017050.1      | GGTCCAGCGGATGAAGAG     | GGACACATTGGCCACACC        |
| <i>Foxo1</i>      | NM_001191846.2   | TCAGGCTAGGAGTTAGTGAGCA | GGGGTGAAGGGCATCTTT        |
| <i>Gclc</i>       | NM_012815.2      | TTGTCGCTGGGGAGTGATTT   | TGATTTTAAAGCGATTGTTCTTCAG |
| <i>Gclm</i>       | NM_017305.2      | TGACTCACAATGACCCAAAAGA | CCTCTGCTTTTCACGATGAC      |
| <i>Gpx</i>        | NM_022525.4      | ATTCTGGGCTTCCCTTGC     | CACCCGGTCGAACGTACT        |
| <i>Mn Sod</i>     | NM_017051.2      | CACCGAGGAGAAGTACCACGA  | TGGCCCCCGCCATTGAACTT      |
| <i>Tbp</i>        | NM_001004198.1   | CCCACCAGCAGTTCAGTAGC   | CAATTCTGGGTTTGATCATTCTG   |

| Supplementary Table S3. Levels of circulating and hepatic cytokines. |                              |               |                |               |
|----------------------------------------------------------------------|------------------------------|---------------|----------------|---------------|
| Plasma                                                               |                              |               |                |               |
|                                                                      |                              | C             | O              | OE            |
|                                                                      | MCP-1 (pg/ml)                | 181.8 ± 45.83 | 230.90 ± 19.58 | 169.8 ± 14.28 |
|                                                                      | TNF- $\alpha$ (pg/ml)        | 2.51 ± 0.49   | 2.90 ± 0.31    | 1.81 ± 0.17   |
|                                                                      | IL-6 (pg/ml)                 | 61.16 ± 28.53 | 81.36 ± 17.47  | 58.45 ± 17.51 |
|                                                                      | PAI-1 (pg/ml)                | 22.16 ± 3.77  | 16.36 ± 1.72   | 12.18 ± 3.32  |
| Liver                                                                |                              |               |                |               |
|                                                                      |                              | C             | O              | OE            |
|                                                                      | MCP-1 (pg/g protein)         | 11.39 ± 3.39  | 22.50 ± 7.90   | 15.96 ± 5.34  |
|                                                                      | TNF- $\alpha$ (pg/g protein) | 3.61 ± 0.52   | 5.44 ± 0.76    | 7.52 ± 2.95   |
|                                                                      | IL-6 (pg/g protein)          | 116.50 ± 8.20 | 185.20 ± 32.07 | 104.5 ± 23.10 |
|                                                                      | PAI-1 (pg/g protein)         | 1.88 ± 0.76   | 3.09 ± 1.57    | 4.88 ± 3.86   |
